# Supplementary material for: Evaluating the Impact of Sequencing Depth on Transcriptome Profiling in Human Adipose
Source: PLoS One. 2013 Jun 24;8(6):e66883. doi: 10.1371/journal.pone.0066883 (PMC3691247; doi:10.1371/journal.pone.0066883)
Supplement: Table S6 — The numbers and percentages of detected AS and DAS events at each sequencing depth for genes defined as "highly expressed" or "lowly expressed". (XLSX) [file pone.0066883.s014.xlsx]

## Sheet: Sheet1
Supplementary Table 6: The numbers and percentages of detected AS and DAS events at each sequencing depth for genes defined as "highly expressed" or "lowly expressed".
	AS events (pre-LPS)		AS events (post-LPS)		DAS events
Depth	High	Low	High	Low	High	Low
5M	1210	433	1141	397	0	0
10M	2210	674	1831	593	0	0
15M	2837	789	2388	717	0	0
20M	3395	915	2755	822	1	1
25M	4020	997	3070	876	1	0
50M	5742	1341	4178	1160	6	7
75M	6787	1531	4775	1324	8	4
100M	7586	1651	5169	1420	14	8
150M	8546	1807	5729	1589	46	15
200M	9125	1938	6002	1692	83	31
300M	9941	2106	6401	1830	221	49
400M	10445	2226	6671	1910	380	83
500M	10914	2332	6944	2007	573	116
High: genes with FPKM > 25% in the 500M datasets for both the pre-LPS and post-LPS samples.
Low: genes with FPKM < 25% in the 500M datasets for both the pre-LPS and post-LPS samples.
